# Supplementary material
Source: ML conference proceedings conference paper supplement (https://proceedings.neurips.cc/paper_files/paper/2017/hash/2e0aca891f2a8aedf265edf533a6d9a8-Abstract.html)
Supplement: Supplementary file [file 2e0aca891f2a8aedf265edf533a6d9a8-Supplemental.zip]

---

# Supplementary Material for Countering Feedback Delays in Multi-Agent Learning

---

**Zhengyuan Zhou**  
Stanford University  
zyzhou@stanford.edu

**Panayotis Mertikopoulos**  
Univ. Grenoble Alpes, CNRS, Inria, LIG  
panayotis.mertikopoulos@imag.fr

**Nicholas Bambos**  
Stanford University  
bambos@stanford.edu

**Peter Glynn**  
Stanford University  
glynn@stanford.edu

**Claire Tomlin**  
UC Berkeley  
tomlin@eecs.berkeley.edu

## Abstract

Some of the missing proofs in the paper can be found here. All the results are stated again here (although the numberings are different from the main paper).

## 1 Examples of $\lambda$ -Variationally Stable Games

Here we give two important classes of games that satisfy the  $\lambda$ -variational stability criterion. This is by no means a comprehensive list.

1. **Convex Potential Games** A game  $\mathcal{G} = (\mathcal{N}, \mathcal{X} = \prod_{i=1}^N \mathcal{X}_i, \{u_i\}_{i=1}^N)$  is called a potential game [1] if there exists a potential function  $V : \mathcal{X} \rightarrow \mathbf{R}$  such that  $u_i(x_i, \mathbf{x}_{-i}) - u_i(\tilde{x}_i, \mathbf{x}_{-i}) = V(x_i, \mathbf{x}_{-i}) - V(\tilde{x}_i, \mathbf{x}_{-i}), \forall i \in \mathcal{N}, \forall \mathbf{x} \in \mathcal{X}, \forall \tilde{x}_i \in \mathcal{X}_i$ . A potential game is called a convex potential game if the potential function  $V(\cdot)$  is concave.<sup>1</sup> Note that in a convex potential game, we have

$$H_{ij}^\lambda(\mathbf{x}) = \frac{1}{2} \lambda_i \nabla_{x_j} v_i(\mathbf{x}) + \frac{1}{2} \lambda_j (\nabla_{x_i} v_j(\mathbf{x}))^T \quad (1.1)$$

$$= \frac{1}{2} \lambda_i \nabla_{x_j} \nabla_{x_i} V(\mathbf{x}) + \frac{1}{2} \lambda_j (\nabla_{x_i} \nabla_{x_j} V(\mathbf{x}))^T. \quad (1.2)$$

Setting  $\lambda = \mathbf{1}$ , we obtain  $H^1(\mathbf{x}) = \nabla^2 V$ , which is negative semi-definite when  $V$  is concave. This implies that in a convex potential game,  $\mathcal{C} = \arg \max_{\mathbf{x} \in \mathcal{X}} V(\mathbf{x})$  is  $\mathbf{1}$ -variationally stable per Lemma 2.2.

2. **Linear Cournot Oligopoly Games** There is a set  $\mathcal{N} = \{1, 2, \dots, N\}$  of firms that supply the market with the same good (or service). Firm  $i$  provides  $x_i \in [0, C_i]$  quantity to the market. The price of the good is a decreasing function of the total quantity of the good supplied to the market:  $P(\mathbf{x}) = P(\sum_{i=1}^N x_i)$ . A common price function takes the linear form:  $P(\sum_{i=1}^N x_i) = a - b(\sum_{i=1}^N x_i), a > 0, b > 0$ . The utility function for firm  $i$  is then  $u_i(\mathbf{x}) = x_i P(\sum_{i=1}^N x_i) - c_i x_i$ , where  $c_i$  is the unit production cost for firm  $i$ . In this case, one can clearly see that this is a concave game. Further, again set setting  $\lambda = \mathbf{1}$ , we have

$$H_{ij}^1(\mathbf{x}) = \frac{1}{2} \frac{\partial v_i(\mathbf{x})}{\partial x_j} + \frac{1}{2} \frac{\partial v_j(\mathbf{x})}{\partial x_i} \quad (1.3)$$

$$= -b\delta_{ij} - b, \quad (1.4)$$

---

<sup>1</sup>It is called convex potential game as opposed to concave potential game because in engineering, the utility is typically framed in terms of costs and convex costs correspond to concave utilities.

where  $\delta_{ij} = 1$  if  $i = j$  and  $\delta_{ij} = 0$  otherwise. Consequently,

$$H_{ij}^1(\mathbf{x}) = -b(\mathbf{I} + \mathbf{1}_{N \times N}),$$

which is negative definite. Hence, the game admits a unique Nash equilibrium that is 1-variationally stable per Lemma 2.2.

## 2 $\lambda$ -Variational Stability: A Key Criterion

Before proceeding, a word on the notation for the remainder of the supplementary material: for convenience, we shall write  $v_j(\mathbf{x})(x_j - x_j^*)$  to denote the inner product between  $v_j(\mathbf{x})$  and  $x_j - x_j^*$  in replacement of the more cumbersome notation  $\langle v_j(\mathbf{x}), x_j - x_j^* \rangle$ .

**Lemma 2.1.** *If  $\mathcal{C}$  is nonempty and  $\lambda$ -stable, then it is closed, convex and contains all Nash equilibria of the game.*

*Proof.* First we show that any element  $\mathbf{x}^* \in \mathcal{C}$  is a Nash equilibrium. For any  $i \in \mathcal{N}$ , take any  $x_i \in \mathcal{X}_i$  and any  $\tau \in (0, 1]$ , set  $\mathbf{x} \triangleq (x_1^*, \dots, x_{i-1}^*, (1 - \tau)x_i^* + \tau x_i, x_{i+1}^*, \dots, x_N^*) = \mathbf{x}^* + \tau(x_i - x_i^*)\mathbf{e}_i$ , where  $\mathbf{e}_i$  is the  $i$ -th unit vector in the standard basis. By convexity of  $\mathcal{X}_i$ ,  $\mathbf{x} \in \mathcal{X}$ . Further,

$$\frac{d}{d\tau} u_i(x_i^* + \tau(x_i - x_i^*); \mathbf{x}_{-i}) = v_i(\mathbf{x})(x_i - x_i^*). \quad (2.1)$$

By applying the variational stability condition to the profiles  $\mathbf{x}^*$  and  $\mathbf{x}$ , it follows that the RHS of the above equation is strictly negative for all  $\tau > 0$ . In turn, this implies that  $u_i(\mathbf{x}) \leq u_i(\mathbf{x}^*)$ , i.e.  $\mathbf{x}^*$  is a Nash equilibrium.

Next, we show that  $\mathcal{C}$  is closed. Take any convergent sequence  $\{\mathbf{x}^j\}_{j=0}^\infty$  in  $\mathcal{C}$ :  $\mathbf{x}^j \in \mathcal{C}$ ,  $\lim_{j \rightarrow \infty} \mathbf{x}^j = \mathbf{x}^*$ . Then, for any  $\mathbf{x} \in \mathcal{X}$ , we have  $\sum_{i=1}^N \lambda_i v_i(\mathbf{x})(x_i - x_i^j) \leq 0, \forall j = 0, 1, \dots$ . Therefore, by continuity, it follows that  $\lim_{j \rightarrow \infty} \sum_{i=1}^N \lambda_i v_i(\mathbf{x})(x_i - x_i^j) = \sum_{i=1}^N \lambda_i v_i(\mathbf{x})(x_i - x_i^*) \leq 0, \forall \mathbf{x} \in \mathcal{C}$ , thereby implying  $\mathbf{x}^* \in \mathcal{C}$ . Since  $\{\mathbf{x}^j\}_{j=0}^\infty$  is any sequence in  $\mathcal{C}$ ,  $\mathcal{C}$  contains all its limit points and is therefore closed.

To see that  $\mathcal{C}$  is convex, take any  $\mathbf{x}^*, \mathbf{y}^* \in \mathcal{C}$  and any  $\tau \in [0, 1]$ . For any  $\mathbf{x} \in \mathcal{X}$ , we have

$$\sum_{i=1}^N \lambda_i v_i(\mathbf{x})(x_i - (\tau x_i^* + (1 - \tau)y_i^*)) = \quad (2.2)$$

$$\tau \sum_{i=1}^N \lambda_i v_i(\mathbf{x})(x_i - x_i^*) + (1 - \tau) \sum_{i=1}^N \lambda_i v_i(\mathbf{x})(x_i - y_i^*) \leq 0, \quad (2.3)$$

thereby establishing that  $\tau \mathbf{x}^* + (1 - \tau)\mathbf{y}^* \in \mathcal{C}$ .

Finally, to see that  $\mathcal{C}$  contains all Nash equilibria of the game, assume that  $\mathbf{z}^* \notin \mathcal{C}$  is a Nash equilibrium. We then have:

$$\sum_{i=1}^N \lambda_i v_i(\mathbf{z}^*)(x_i - z_i^*) \leq 0, \forall \mathbf{x} \in \mathcal{X}. \quad (2.4)$$

Take an arbitrary  $\mathbf{x}^* \in \mathcal{C}$ . Since  $\mathcal{C}$  is  $\lambda$ -variational stable and  $\mathbf{z}^* \notin \mathcal{C}$ , we have  $\sum_{i=1}^N \lambda_i v_i(\mathbf{z}^*)(z_i^* - x_i^*) < 0$ , implying that  $\sum_{i=1}^N \lambda_i v_i(\mathbf{z}^*)(x_i^* - z_i^*) > 0$ , which contradicts Equation 2.4.  $\square$

**Lemma 2.2.** *Consider a game with continuous actions ( $\mathcal{N}, \mathcal{X} = \prod_{i=1}^N \mathcal{X}_i, \{u_i\}_{i=1}^N$ ), where each  $u_i$  is twice continuously differentiable. For each  $\mathbf{x} \in \mathcal{X}$ , define the  $\lambda$ -weighted Hessian matrix  $H^\lambda(\mathbf{x})$  as follows:*

$$H_{ij}^\lambda(\mathbf{x}) = \frac{1}{2} \lambda_i \nabla_{x_j} v_i(\mathbf{x}) + \frac{1}{2} \lambda_j (\nabla_{x_i} v_j(\mathbf{x}))^T. \quad (2.5)$$

*If  $H^\lambda(\mathbf{x})$  is negative-definite for every  $\mathbf{x} \in \mathcal{X}$ , then the game admits a unique Nash equilibrium  $\mathbf{x}^*$  that is  $\lambda$ -globally variational stable.*

*Proof.* Per Theorem 6 of [3], it follows that

$$\sum_{i=1}^N \lambda_i (v_i(\mathbf{x}) - v_i(\tilde{\mathbf{x}}))(x_i - \tilde{x}_i) \leq 0, \forall \mathbf{x}, \tilde{\mathbf{x}} \in \mathcal{X}, \quad (2.6)$$

where equality holds if and only if  $\mathbf{x} = \tilde{\mathbf{x}}$ . Per Theorem 2 of [3], this inequality then implies that there exists a unique Nash equilibrium  $\mathbf{x}^*$ . Plug  $\mathbf{x}^*$  into Inequality 2.6 for  $\tilde{\mathbf{x}}$ , we have that for any  $\mathbf{x} \in \mathcal{X}$ :

$$\sum_{i=1}^N \lambda_i v_i(\mathbf{x})(x_i - x_i^*) \leq \sum_{i=1}^N \lambda_i v_i(\mathbf{x}^*)(x_i - x_i^*) \leq 0,$$

where the second inequality follows from  $\mathbf{x}^*$  is a Nash equilibrium. Furthermore, both equality are achieved if and only if  $\mathbf{x} = \mathbf{x}^*$ . This implies that  $\{\mathbf{x}^*\}$  is  $\lambda$ -variational stable.  $\square$

### 3 Convergence under Synchronous and Bounded Delays

---

#### Algorithm 1 Online Mirror Descent on Games under Delays

---

```

1: Each player  $i$  chooses an initial  $y_i^0$ .
2: for  $t = 0, 1, 2, \dots$  do
3:   for  $i = 1, \dots, N$  do
4:      $x_i^t = \arg \max_{x_i \in \mathcal{X}_i} \{ \langle y_i^t, x_i \rangle - h_i(x_i) \}$ 
5:      $y_i^{t+1} = y_i^t + \alpha^t \sum_{s \in \mathcal{G}_i^t} v_i(\mathbf{x}^s)$ 
6:   end for
7: end for

```

---

**Assumption 1.** The delays are assumed to be:

1. Synchronous:  $\mathcal{G}_i^t = \mathcal{G}_j^t, \forall i, j, \forall t$ .
2. Bounded:  $d_i^t \leq D, \forall i, \forall t$  (for some positive integer  $D$ ).

**Lemma 3.1.** For each  $i \in \{1, \dots, N\}$ , let  $h_i : \mathcal{X}_i \rightarrow \mathbb{R}$  be a regularizer with respect to the norm  $\|\cdot\|_i$  that is  $K_i$ -strongly convex and let  $\lambda \in \mathbb{R}_{++}^N$ . Then  $\forall \mathbf{x} \in \mathcal{X}, \forall \tilde{\mathbf{y}}, \mathbf{y} \in \mathbb{R}^{\sum_{i=1}^N d_i}$ :

1.  $F^\lambda(\mathbf{x}, \mathbf{y}) \geq \frac{1}{2} \sum_{i=1}^N K_i \lambda_i \|C_i(y_i) - x_i\|_i^2 \geq \frac{1}{2} (\min_i K_i \lambda_i) \sum_{i=1}^N \|C_i(y_i) - x_i\|_i^2$ .
2.  $F^\lambda(\mathbf{x}, \tilde{\mathbf{y}}) \leq F^\lambda(\mathbf{x}, \mathbf{y}) + \sum_{i=1}^N \lambda_i \langle \tilde{y}_i - y_i, C_i(y_i) - x_i \rangle + \frac{1}{2} (\max_i \frac{\lambda_i}{K_i}) \sum_{i=1}^N (\|\tilde{y}_i - y_i\|_i^*)^2$ ,  
where  $\|\cdot\|_i^*$  is the dual norm of  $\|\cdot\|_i$  (i.e.  $\|y_i\|_i^* = \max_{\|x_i\|_i \leq 1} \langle x_i, y_i \rangle$ ).

**Theorem 3.2.** Consider a game with continuous actions  $(\mathcal{N}, \mathcal{X} = \prod_{i=1}^N \mathcal{X}_i, \{u_i\}_{i=1}^N)$  that admits  $\mathbf{x}^*$  as the unique Nash equilibrium that is  $\lambda$ -variationally stable. Under Assumption 1 for the delays, the OMD iterate  $\mathbf{x}^t$  given in Algorithm 1 converges to  $\mathbf{x}^*$ , irrespective of the initial point  $\mathbf{x}^0$ .

*Remark 3.1.* We repeat the four main steps in the following remark and prove each of them in detail in order.

1. Since the delays are synchronous, we denote by  $\mathcal{G}^t$  the common set and  $d^t$  the common delay at round  $t$ . The gradient update in OMD under delays can then be written as:

$$y_i^{t+1} = y_i^t + \alpha^t \sum_{s \in \mathcal{G}^t} v_i(\mathbf{x}^s) = y_i^t + \alpha^t \left\{ |\mathcal{G}^t| v_i(\mathbf{x}^t) + \sum_{s \in \mathcal{G}^t} \{v_i(\mathbf{x}^s) - v_i(\mathbf{x}^t)\} \right\}. \quad (3.1)$$

Define  $b_i^t = \sum_{s \in \mathcal{G}^t} \{v_i(\mathbf{x}^s) - v_i(\mathbf{x}^t)\}$ . We show that under the delay assumption (Assumption 1),  $\lim_{t \rightarrow \infty} \|b_i^t\|_i^* = 0$  for each player  $i$ .

2. Define  $\mathbf{b}^t = (b_1^t, \dots, b_N^t)$  and we have  $\lim_{t \rightarrow \infty} \mathbf{b}^t = 0$  per Claim 1. Since each player's gradient update can be written as  $y_i^{t+1} = y_i^t + \alpha^t (|\mathcal{G}^t| v_i(\mathbf{x}^t) + b_i^t)$  per Claim 1, we can then write the joint OMD update (of all players) as:

$$\mathbf{x}^t = C(\mathbf{y}^t), \quad (3.2)$$

$$\mathbf{y}^{t+1} = \mathbf{y}^t + \alpha^t \{|\mathcal{G}^t| v(\mathbf{x}^t) + \mathbf{b}^t\}. \quad (3.3)$$

Let  $B(\mathbf{x}^*, \epsilon) \triangleq \{\mathbf{x} \in \mathcal{X} \mid \|\mathbf{x} - \mathbf{x}^*\| < \epsilon\}$  be the open ball centered around  $\mathbf{x}^*$  with radius  $\epsilon$ . Then, using  $\lambda$ -Fenchel coupling as a “energy” function and leveraging the handle on  $\mathbf{b}^t$  given by Claim 1, we can establish that, for any  $\epsilon > 0$  the iterate  $\mathbf{x}^t$  will eventually enter  $B(\mathbf{x}^*, \epsilon)$  and visit  $B(\mathbf{x}^*, \epsilon)$  infinitely often, no matter what the initial point  $\mathbf{x}^0$  is. Mathematically, the claim is that  $\forall \epsilon > 0, \forall \mathbf{x}^0, |\{t \mid \mathbf{x}^t \in B(\mathbf{x}^*, \epsilon)\}| = \infty$ .

3. Fix any  $\delta > 0$  and consider the set  $\tilde{B}(\mathbf{x}^*, \delta) \triangleq \{C(\mathbf{y}) \mid F^\lambda(\mathbf{x}^*, \mathbf{y}) < \delta\}$ . In other words,  $\tilde{B}(\mathbf{x}^*, \delta)$  is some “neighborhood” of  $\mathbf{x}^*$ , which contains every  $\mathbf{x}$  that is an image of some  $\mathbf{y}$  (under the choice map  $C(\cdot)$ ) that is within  $\delta$  distance of  $\mathbf{x}^*$  under the  $\lambda$ -Fenchel coupling “metric”. Although  $F^\lambda(\mathbf{x}^*, \mathbf{y})$  is not a metric,  $\tilde{B}(\mathbf{x}^*, \delta)$  contains an open ball within it. Mathematically, the claim is that for any  $\delta > 0, \exists \epsilon(\delta) > 0$  such that:  $B(\mathbf{x}^*, \epsilon) \subset \tilde{B}(\mathbf{x}^*, \delta)$ .
4. For any “neighborhood”  $\tilde{B}(\mathbf{x}^*, \delta)$ , after long enough iterations, if  $\mathbf{x}^t$  ever enters  $\tilde{B}(\mathbf{x}^*, \delta)$ , it will be trapped inside  $\tilde{B}(\mathbf{x}^*, \delta)$  thereafter. Mathematically, the claim is that for any  $\delta > 0$ , there exists a  $T(\delta)$ , such that for any  $t \geq T(\delta)$ , if  $\mathbf{x}^t \in \tilde{B}(\mathbf{x}^*, \delta)$ , then  $\mathbf{x}^{\tilde{t}} \in \tilde{B}(\mathbf{x}^*, \delta), \forall \tilde{t} \geq t$ .

Putting all four elements above together, we note that the significance of Claim 3 is that, since the iterate  $\mathbf{x}^t$  will enter  $B(\mathbf{x}^*, \epsilon)$  infinitely often (per Claim 2),  $\mathbf{x}^t$  must enter  $\tilde{B}(\mathbf{x}^*, \delta)$  infinitely often. It therefore follows that, per Claim 4, starting from iteration  $t$ ,  $\mathbf{x}^t$  will remain in  $\tilde{B}(\mathbf{x}^*, \delta)$ . Since this is true for any  $\delta > 0$ , we have  $F^\lambda(\mathbf{x}^*, \mathbf{y}^t) \rightarrow 0$  as  $t \rightarrow \infty$ . Per Statement 1 in Lemma 3.1, this leads to that  $\|C(\mathbf{y}^t) - \mathbf{x}^*\| \rightarrow 0$  as  $t \rightarrow \infty$ , thereby establishing that  $\mathbf{x}^t = C(\mathbf{y}^t) \rightarrow \mathbf{x}^*$  as  $t \rightarrow \infty$ .

*Proof:*

1. We start by fixing some notation. Let  $\mathbf{y}^t = (y_1^t, \dots, y_N^t), \mathbf{x}^t = (x_1^t, \dots, x_N^t)$  be the iterates generated in Algorithm 1. Since  $\mathcal{X}$  is compact and  $v(\cdot)$  is continuous,  $V_{\max}^i \triangleq \max_{x_i \in \mathcal{X}_i} \|v_i(\mathbf{x})\|_i^* < \infty, V_{\max} \triangleq \max_{\mathbf{x} \in \mathcal{X}} \|v(\mathbf{x})\|^* = \sum_{i=1}^N V_{\max}^i < \infty$ . Since each  $h_i(\cdot)$  is  $K_i$  strongly convex (with respect to  $\|\cdot\|_i$ ), it follows from a well-known result in convex analysis [2] that the choice map  $C(\cdot)$  is  $\frac{1}{K}$ -Lipschitz continuous, where  $K \triangleq \min_i K_i$ . Finally, since each  $v_i(\cdot)$  is Lipschitz continuous,  $v(\cdot)$  is Lipschitz continuous as well and denote the Lipschitz constant as  $L$ .

Since  $d^t \leq D, \forall t$ , it follows that  $|\mathcal{G}^t| \leq D$  and  $\min \mathcal{G}^t \geq t - D + 1$ , for otherwise at least one gradient comes from  $D + 1$  rounds before. Further, per the OMD update (first equality in Equation 3.1), we have:

$$\|\mathbf{y}^{t+1} - \mathbf{y}^t\|^* = \sum_{i=1}^N \|y_i^{t+1} - y_i^t\|_i^* = \sum_{i=1}^N \|\alpha^t \sum_{s \in \mathcal{G}^t} v_i(\mathbf{x}^s)\|_i^* \quad (3.4)$$

$$\leq \alpha^t \sum_{i=1}^N \sum_{s \in \mathcal{G}^t} \|v_i(\mathbf{x}^s)\|_i^* \leq \alpha^t \sum_{i=1}^N |\mathcal{G}^t| V_{\max}^i \leq \alpha^t D V_{\max} \quad (3.5)$$

By definition, we can expand  $b_i^t$  as follows:

$$b_i^t = \sum_{s \in \mathcal{G}^t} \{v_i(\mathbf{x}^s) - v_i(\mathbf{x}^t)\} \leq \sum_{s \in \mathcal{G}^t} L \|\mathbf{x}^s - \mathbf{x}^t\| = \sum_{s \in \mathcal{G}^t} L \|C(\mathbf{y}^s) - C(\mathbf{y}^t)\| \leq \sum_{s \in \mathcal{G}^t} \frac{L}{K} \|\mathbf{y}^s - \mathbf{y}^t\|^* \quad (3.6)$$

$$\leq \frac{L}{K} \sum_{s \in \mathcal{G}^t} \{\|\mathbf{y}^s - \mathbf{y}^{s+1}\|^* + \|\mathbf{y}^{s+1} - \mathbf{y}^{s+2}\|^* + \dots + \|\mathbf{y}^{t-1} - \mathbf{y}^t\|^*\} \quad (3.7)$$

$$\leq \frac{L}{K} \sum_{s \in \mathcal{G}^t} \{\alpha^s DV_{\max} + \alpha^{s+1} DV_{\max} + \dots + \alpha^t DV_{\max}\} \quad (3.8)$$

$$= \frac{LDV_{\max}}{K} \sum_{s \in \mathcal{G}^t} \sum_{k=s}^t \alpha^k \leq \frac{LDV_{\max}}{K} |\mathcal{G}^t| \sum_{s=\min \mathcal{G}^t}^t \alpha^s \leq \frac{LD^2 V_{\max}}{K} \sum_{s=\min \mathcal{G}^t}^t \alpha^s \quad (3.9)$$

$$\leq \frac{LD^2 V_{\max}}{K} \sum_{s=t-D+1}^t \alpha^s \leq \frac{LD^3 V_{\max}}{K} \alpha^{t-D+1} \rightarrow 0, \text{ as } t \rightarrow \infty, \quad (3.10)$$

where the first inequality in Equation 3.6 follows from the fact that  $v(\cdot)$  is  $L$ -Lipschitz continuous, the second inequality in Equation 3.6 follows from the fact that  $C(\cdot)$  is  $\frac{1}{K}$ -Lipschitz continuous, Equation 3.8 follows from Equations 3.4 and 3.5 and the first inequality in Equation 3.9 follows from that  $\alpha^t$ 's are non-negative and the second inequality in Equation 3.10 follows from  $\alpha^t$  is non-increasing. Lastly, the convergence to 0 in Equation 3.10 follows from the fact that  $\alpha^t$  is square-summable.

2. Fix an arbitrary  $\epsilon > 0$ . Assume for contradiction purposes that  $\mathbf{x}^t$  only visits  $B(\mathbf{x}^*, \epsilon)$  a finite number of times and hence let  $t^0 - 1$  be the last time  $\mathbf{x}^t$  is in  $B(\mathbf{x}^*, \epsilon)$ :  $\forall t \geq t^0, \mathbf{x}^t \in \mathcal{X} - B(\mathbf{x}^*, \epsilon)$ . Since  $\mathcal{X} - B(\mathbf{x}^*, \epsilon)$  is a compact set and  $v_i(\mathbf{x})$  is continuous in  $\mathbf{x}$  and since by assumption  $\sum_{i=1}^N \lambda_i v_i(\mathbf{x})(x_i - x_i^*) < 0, \forall \mathbf{x} \in \mathcal{X}, \mathbf{x} \neq \mathbf{x}^*$ , it follows that there exists a  $c_{\max}(\epsilon) < 0$  such that

$$\sum_{i=1}^N \lambda_i v_i(\mathbf{x})(x_i - x_i^*) \leq c_{\max}(\epsilon), \forall \mathbf{x} \in \mathcal{X} - B(\mathbf{x}^*, \epsilon). \quad (3.11)$$

Per Claim 1,  $\lim_{t \rightarrow \infty} \mathbf{b}^t = \mathbf{0}$ , therefore,  $\|\mathbf{b}^t\|^*$  is bounded and we denote  $B_{\max} \triangleq \max_t \|\mathbf{b}^t\|^*$ . Next denote  $R = \max_{\mathbf{x} \in \mathcal{X}} \|\mathbf{x}\|$ ,  $\lambda_{\max} \triangleq \max_i \lambda_i$  and  $\beta^t \triangleq \max_i \frac{(\alpha^t)^2 \lambda_i}{2K_i}$  and note that  $\sum_{t=1}^{\infty} \beta^t < \infty$ . Using Lemma 3.1, we have  $\forall t \geq t^0$ :

$$F^\lambda(\mathbf{x}^*, \mathbf{y}^{t+1}) = F^\lambda(\mathbf{x}^*, \mathbf{y}^t + \alpha^t \{|\mathcal{G}^t| v(\mathbf{x}^t) + \mathbf{b}^t\}) \leq \quad (3.12)$$

$$F^\lambda(\mathbf{x}^*, \mathbf{y}^t) + \sum_{i=1}^N \lambda_i (\alpha^t \{|\mathcal{G}^t| v_i(\mathbf{x}^t) + b_i^t\}) (C_i(y_i^t) - x_i^*) + \beta^t (\|\mathcal{G}^t| v(\mathbf{x}^t) + \mathbf{b}^t\|^*)^2 = \quad (3.13)$$

$$F^\lambda(\mathbf{x}^*, \mathbf{y}^t) + \alpha^t \left\{ |\mathcal{G}^t| \sum_{i=1}^N \lambda_i v_i(\mathbf{x}^t)(x_i^t - x_i^*) + \sum_{i=1}^N \lambda_i b_i^t(x_i^t - x_i^*) \right\} + \beta^t (\|\mathcal{G}^t| v(\mathbf{x}^t) + \mathbf{b}^t\|^*)^2 \quad (3.14)$$

$$\leq F^\lambda(\mathbf{x}^*, \mathbf{y}^t) + \alpha^t \{|\mathcal{G}^t| c_{\max}(\epsilon) + \lambda_{\max} \|\mathbf{b}^t\|^* \|\mathbf{x}^t - \mathbf{x}^*\|\} + \beta^t \{2(\|\mathcal{G}^t| v(\mathbf{x}^t)\|^*)^2 + 2(\|\mathbf{b}^t\|^*)^2\} \quad (3.15)$$

$$\leq F^\lambda(\mathbf{x}^*, \mathbf{y}^t) + \alpha^t \{|\mathcal{G}^t| c_{\max}(\epsilon) + \lambda_{\max} R \|\mathbf{b}^t\|^*\} + 2\beta^t (D^2 V_{\max}^2 + B_{\max}^2) \quad (3.16)$$

$$\leq F^\lambda(\mathbf{x}^*, \mathbf{y}^{t^0}) + \left( \sum_{k=t^0}^t \alpha^k \right) \left\{ \frac{\sum_{k=t^0}^t \alpha^k |\mathcal{G}^k|}{\sum_{k=t^0}^t \alpha^k} c_{\max}(\epsilon) + \lambda_{\max} R \frac{\sum_{k=t^0}^t \alpha^k \|\mathbf{b}^k\|^*}{\sum_{k=t^0}^t \alpha^k} \right\} \quad (3.17)$$

$$+ 2 \left( \sum_{k=t^0}^t \beta^k \right) (D^2 V_{\max}^2 + B_{\max}^2), \quad (3.18)$$

where Equation (3.15) follows from Equation (3.11) and Equation (3.17) follows from telescoping.

Next, we show that:

$$1 \leq \lim_{t \rightarrow \infty} \frac{\sum_{k=t^0}^t \alpha^k |\mathcal{G}^k|}{\sum_{k=t^0}^t \alpha^k} \leq D. \quad (3.19)$$

Partition the rounds into intervals  $\{0, 1, \dots, D-1\}, \{D, D+1, \dots, 2D-1\}, \dots$ . Since each gradient is received exactly once with at most delay  $D$ , the gradients corresponding to the first interval will have been completely received by time  $2D-1$  (i.e. by the end of the second interval). Similarly, the gradients corresponding to the  $l$ -th interval will have been all received by time  $(l+1)D-1$ . Consequently, since  $\alpha^t$  is non-increasing, it follows that:

$$\sum_{k=0}^{\infty} \alpha^k |\mathcal{G}^k| \geq \sum_{l=2}^{\infty} D \alpha^{lD-1} \geq \sum_{k=2D-1}^{\infty} \alpha^k = \infty.$$

Consequently,

$$\lim_{t \rightarrow \infty} \frac{\sum_{k=t^0}^t \alpha^k |\mathcal{G}^k|}{\sum_{k=t^0}^t \alpha^k} = \lim_{t \rightarrow \infty} \frac{\sum_{k=0}^t \alpha^k |\mathcal{G}^k|}{\sum_{k=0}^t \alpha^k} = \lim_{t \rightarrow \infty} \frac{\sum_{k=0}^t \alpha^k |\mathcal{G}^k|}{\sum_{k=2D-1}^t \alpha^k} \geq 1.$$

Finally,  $\frac{\sum_{k=t^0}^t \alpha^k |\mathcal{G}^k|}{\sum_{k=t^0}^t \alpha^k} \leq D$  follows easily by noting that  $|\mathcal{G}^k| \leq D$ .

Next, note that since  $\lim_{t \rightarrow \infty} \mathbf{b}^t = \mathbf{0}$  and  $\sum_{t=0}^{\infty} \alpha^t = \infty$ , it follows that:

$$\frac{\sum_{k=t^0}^t \alpha^k \|\mathbf{b}^k\|^*}{\sum_{k=t^0}^t \alpha^k} \rightarrow 0, \text{ as } t \rightarrow \infty. \quad (3.20)$$

Combining Equation 3.19 and Equation 3.20, we obtain:

$$\left( \sum_{k=t^0}^t \alpha^k \right) \left\{ \frac{\sum_{k=t^0}^t \alpha^k |\mathcal{G}^k|}{\sum_{k=t^0}^t \alpha^k} c_{\max}(\epsilon) + \lambda_{\max} R \frac{\sum_{k=t^0}^t \alpha^k \|\mathbf{b}^k\|^*}{\sum_{k=t^0}^t \alpha^k} \right\} \rightarrow -\infty, \text{ as } t \rightarrow \infty.$$

Since  $\sum_{k=t^0}^{\infty} \beta^k < \infty$ , Equation (3.17) implies that  $F^\lambda(\mathbf{x}^*, \mathbf{y}^t) \rightarrow -\infty$ , which contradicts the first statement in Lemma 3.1. The claim therefore follows.

3. Assume for contradiction purposes no  $B(\mathbf{x}^*, \epsilon)$  is contained in  $\tilde{B}(\mathbf{x}^*, \delta)$ , which means that for any  $\delta > 0, \exists \mathbf{y}^l$ , such that  $\|Q(\mathbf{y}^l) - \mathbf{x}^*\| = \delta$  but  $F^\lambda(\mathbf{x}^*, \mathbf{y}^l) \geq \epsilon$ . This produces a sequence  $\{\mathbf{y}^l\}_{l=0}^{\infty}$  such that  $C(\mathbf{y}^l) \rightarrow \mathbf{x}^*$  but  $F^\lambda(\mathbf{x}^*, \mathbf{y}^l) \geq \epsilon, \forall l$ . This contradicts with the fact that the choice map  $C(\cdot)$  is  $\lambda$ -Fenchel coupling conforming, because by definition it holds that if  $C(\mathbf{y}^t) \rightarrow x$ , then  $F^\lambda(x, \mathbf{y}^t) \rightarrow 0$ . Consequently, the claim follows.
4. Fix a given  $\delta > 0$ . Since  $\beta^t$  is summable and  $\alpha^t$  is not summable but square summable, it follows that  $\beta^t \rightarrow 0, \alpha^t \rightarrow 0, \frac{\alpha^t}{\beta^t} \rightarrow \infty$  as  $t \rightarrow \infty$ . There, denote

- (a)  $T^1(\delta) = \arg \min_t \{t \mid \beta^s < \frac{\delta}{8(D^2 V_{\max}^2 + B_{\max}^2)}, \forall s \geq t\}.$
- (b)  $T^2(\delta) = \arg \min_t \{t \mid c_{\max}(\epsilon(\frac{\delta}{2})) < -2\lambda_{\max} R \|\mathbf{b}^s\|^*, \forall s \geq t\}.$
- (c)  $T^3(\delta) = \arg \min_t \{t \mid \alpha^s < \frac{\delta}{4\lambda_{\max} R B_{\max}}, \forall s \geq t\}.$
- (d)  $T^4(\delta) = \arg \min_t \{t \mid \frac{\alpha^s}{\beta^s} > \frac{4(D^2 V_{\max}^2 + B_{\max}^2)}{-c_{\max}(\epsilon(\frac{\delta}{2}))}, \forall s \geq t\}.$

We have  $T^1(\delta) < \infty, T^2(\delta) < \infty$  (since  $\lim_{t \rightarrow \infty} \|\mathbf{b}^t\|^* = 0$  and note that  $c_{\max}(\epsilon(\frac{\delta}{2})) < 0$  by definition),  $T^3(\delta) < \infty, T^4(\delta) < \infty$ . Take

$$T(\delta) = \max(T^1(\delta), T^2(\delta), T^3(\delta), T^4(\delta)).$$

Now take any  $t \geq T(\delta)$ . We show that if  $\mathbf{x}^t \in \tilde{B}(\mathbf{x}^*, \delta)$ , then  $\mathbf{x}^{t+1} \in \tilde{B}(\mathbf{x}^*, \delta)$ . To see that this statement holds, let  $\mathbf{x}^t \in \tilde{B}(\mathbf{x}^*, \delta)$ , which implies that  $F^\lambda(\mathbf{x}^*, \mathbf{y}^t) < \delta$ . Note that it suffices to consider  $\mathcal{G}^t \neq \emptyset$ , for otherwise  $\mathbf{x}^{t+1} = \mathbf{x}^t$ .

Now there are two possibilities:

- (a) Possibility 1:  $\mathbf{x}^t \in B(\mathbf{x}^*, \epsilon(\frac{\delta}{2}))$ .  
(b) Possibility 2:  $\mathbf{x}^t \in \tilde{B}(\mathbf{x}^*, \delta) - B(\mathbf{x}^*, \epsilon(\frac{\delta}{2}))$ .

Under Possibility 1, it follows

$$F^\lambda(\mathbf{x}^*, \mathbf{y}^{t+1}) \leq F^\lambda(\mathbf{x}^*, \mathbf{y}^t) + \alpha^t \sum_{i=1}^N \lambda_i \{ |\mathcal{G}^t| v_i(\mathbf{x}^t) + b_i^t \} (x_i^t - x_i^*) + \beta^t (\| |\mathcal{G}^t| v(\mathbf{x}_t) + \mathbf{b}^t \|^*)^2 \quad (3.21)$$

$$\leq F^\lambda(\mathbf{x}^*, \mathbf{y}^t) + \alpha^t \sum_{i=1}^N \lambda_i b_i^t (x_i^t - x_i^*) + \beta^t \{ 2(\| |\mathcal{G}^t| v(\mathbf{x}_t) \|^*)^2 + 2(\| \mathbf{b}^t \|^*)^2 \} \quad (3.22)$$

$$\leq F^\lambda(\mathbf{x}^*, \mathbf{y}^t) + \alpha^t \lambda_{\max} R B_{\max} + 2\beta^t (D^2 V_{\max}^2 + B_{\max}^2) \quad (3.23)$$

$$< F^\lambda(\mathbf{x}^*, \mathbf{y}^t) + \frac{\delta}{4\lambda_{\max} R B_{\max}} \lambda_{\max} R B_{\max} + \frac{2\delta}{8(D^2 V_{\max}^2 + B_{\max}^2)} (D^2 V_{\max}^2 + B_{\max}^2) \quad (3.24)$$

$$\leq \frac{\delta}{2} + \frac{\delta}{4} + \frac{\delta}{4} = \delta, \quad (3.25)$$

where the second inequality follows from  $\lambda$ -variational stability and the last inequality follows from the fact that  $\mathbf{x}^t \in B(\mathbf{x}^*, \epsilon(\frac{\delta}{2})) \subset \tilde{B}(\mathbf{x}^*, \frac{\delta}{2})$  per Claim 2.

Under Possibility 2, it follows from Equation 3.16 that

$$F^\lambda(\mathbf{x}^*, \mathbf{y}^{t+1}) \leq F^\lambda(\mathbf{x}^*, \mathbf{y}^t) + \alpha^t \left\{ |\mathcal{G}^t| c_{\max}(\epsilon(\frac{\delta}{2})) + \lambda_{\max} R \| \mathbf{b}^t \|^* \right\} + 2\beta^t (D^2 V_{\max}^2 + B_{\max}^2) \quad (3.26)$$

$$\leq F^\lambda(\mathbf{x}^*, \mathbf{y}^t) + 2\beta^t (D^2 V_{\max}^2 + B_{\max}^2) \left\{ \frac{\alpha^t c_{\max}(\epsilon(\frac{\delta}{2})) + \lambda_{\max} R \| \mathbf{b}^t \|^*}{\beta^t 2(D^2 V_{\max}^2 + B_{\max}^2)} + 1 \right\} \quad (3.27)$$

$$\leq F^\lambda(\mathbf{x}^*, \mathbf{y}^t) + 2\beta^t (V_{\max}^2 + B_{\max}^2) \left\{ \frac{\alpha^t c_{\max}(\epsilon(\frac{\delta}{2}))}{\beta^t 4(V_{\max}^2 + B_{\max}^2)} + 1 \right\} \quad (3.28)$$

$$< F^\lambda(\mathbf{x}^*, \mathbf{y}^t) < \epsilon, \quad (3.29)$$

where the second inequality follows from  $|\mathcal{G}^t| \geq 1$  since it is not empty by assumption and  $c_{\max} < 0$ , the third inequality follows from  $\lambda_{\max} R \| \mathbf{b}^t \|^* < -\frac{1}{2} c_{\max}(\epsilon(\frac{\delta}{2}))$  since  $t \geq T^2(\delta)$  and the second-to-last inequality follows from  $\frac{\alpha^t c_{\max}(\epsilon(\frac{\delta}{2}))}{\beta^t 4(V_{\max}^2 + B_{\max}^2)} + 1 < 0$  since  $t \geq T^4(\delta)$ . ■

## References

- [1] D. MONDERER AND L. S. SHAPLEY, *Potential games*, Games and economic behavior, 14 (1996), pp. 124–143.
- [2] R. T. ROCKAFELLAR, *Convex analysis*, Princeton university press, 2015.
- [3] J. B. ROSEN, *Existence and uniqueness of equilibrium points for concave n-person games*, Econometrica: Journal of the Econometric Society, (1965), pp. 520–534.
